# Supplementary material
Source: Springer Nature journal article supplement (https://www.springerprofessional.de/resource/supplementary/13638_2013_833_MOESM12_ESM.pdf/11898570)

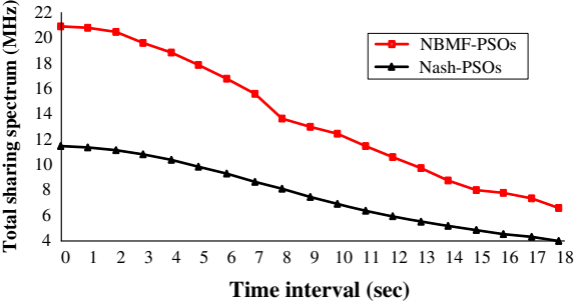

Supplement: MOESM12 [file 11898570]
